# Supplementary material
Source: PubMed Central journal article supplement (PMC9957664)
Supplement: NIHMS1875847-supplement-Supporting_Information.pdf [file NIHMS1875847-supplement-Supporting_Information.pdf]

## Supporting Information for

### **The role of serine coordination in the structural and functional protection of the nitrogenase P-cluster**

Hannah L. Rutledge, Mackenzie J. Field,<sup>2</sup> Jonathan Rittle,<sup>1,†</sup> Michael T. Green,<sup>2,3</sup>  
F. Akif Tezcan<sup>\*,1</sup>

<sup>1</sup> Department of Chemistry and Biochemistry, University of California, San Diego, 9500 Gilman Drive, La Jolla, California 92093-0356, USA.

<sup>2</sup> Department of Chemistry, University of California, Irvine, Irvine, California 92697, USA.

<sup>3</sup> Department of Molecular Biology and Biochemistry, University of California, Irvine, Irvine, California 92697, USA.

\*tezcan@ucsd.edu

This document includes:

-Supporting Figures S1 – S5

-Supporting Tables S1 – S3

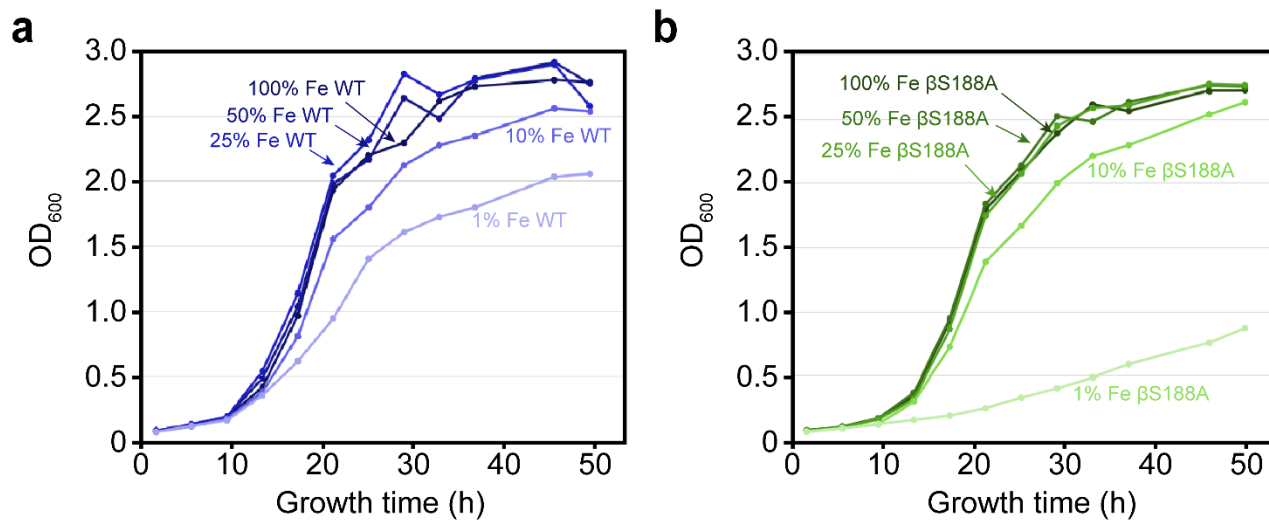

**Figure S1.** Diazotrophic growth curves of *Av* cells under varying Fe concentrations (100%, 50%, 25%, 10%, and 1% Fe). 100% Fe corresponds to 35  $\mu$ M Fe. (a) wt *Av* growth curves had doubling times of 3.9, 4.0, 4.0, 4.2, and 6.3 h at 100%, 50%, 25%, 10%, and 1% Fe, respectively. (b)  $\beta$ S188A *Av* growth curves had doubling times of 3.9, 3.9, 3.8, 4.1, and 12.7 h at 100%, 50%, 25%, 10%, and 1% Fe, respectively.

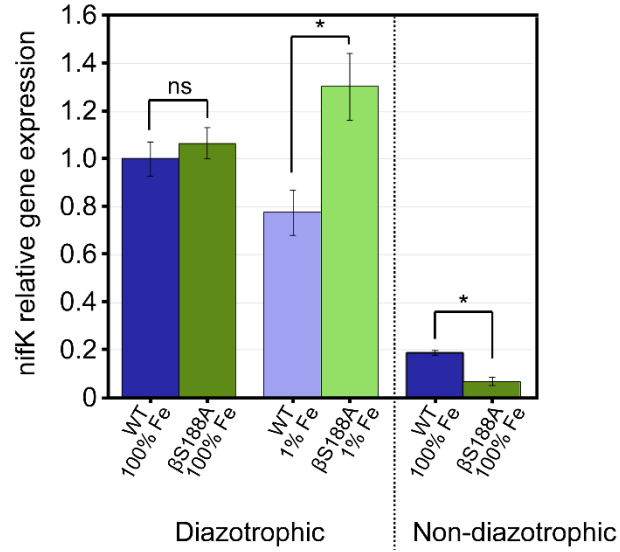

**Figure S2.** RT-qPCR of *nifK* gene expression of wt and  $\beta$ S188A *Av* cells. Left side: diazotrophic growth under varying Fe concentrations (100% and 1%). Right side: non-diazotrophic growth (100% Fe). Expression levels were normalized to the expression level of reference gene *rho*, and the presented data is relative to wt *Av* cells grown diazotrophically with 100% Fe. Experiment was carried out in technical triplicate of biological triplicate

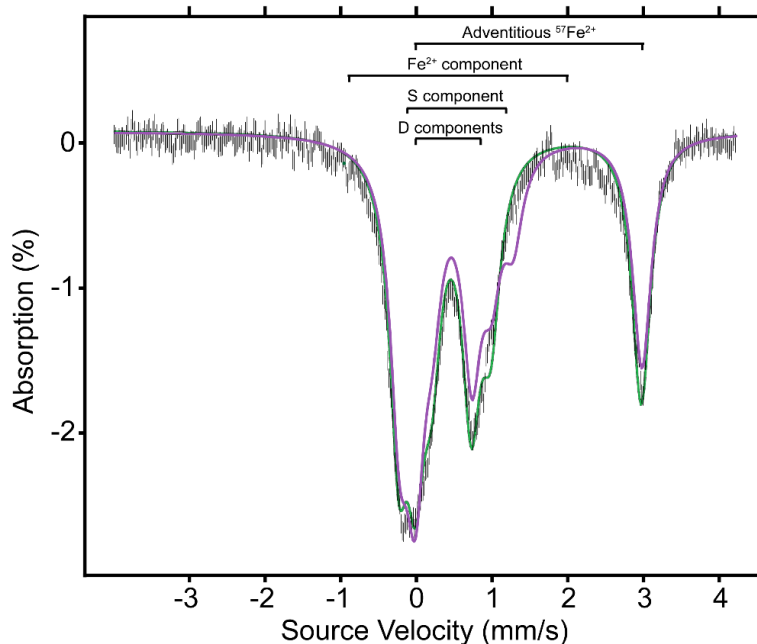

**Figure S3. Mössbauer spectrum of Av  $\beta$ S188A MoFeP reconstituted with  $^{57}\text{Fe}$  with multiple simulations.** Spectrum (black) was recorded at 80 K and 54 mT. Oxidized  $\beta$ S188A was reconstituted with  $^{57}\text{Fe}^{2+}$ . The simulated fit reported in the main text is depicted in green. Simulation including the S component reported by McLean et al. (*J. Biol. Chem.* 1987, 262, 12900), depicted in purple, did not fit the data as well.

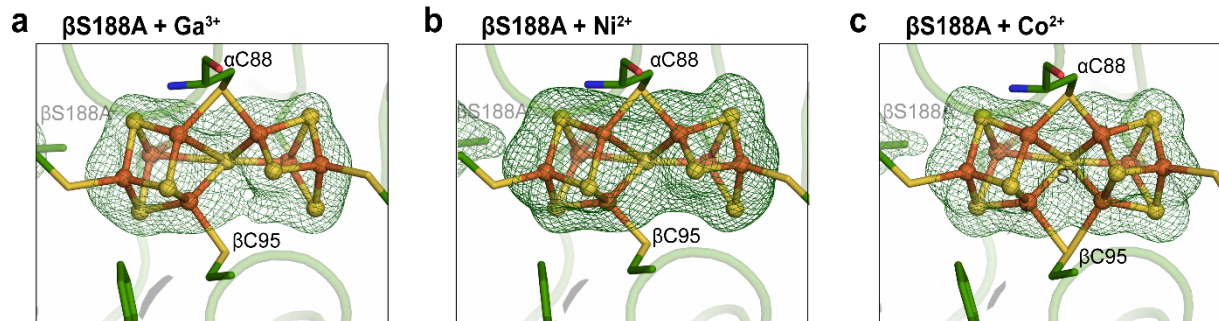

**Figure S4.**  $2F_o - F_c$  omit maps of (a) Ga<sup>3+</sup>, (b) Ni<sup>2+</sup>, and (c) Co<sup>2+</sup> reconstituted  $\beta$ S188A MoFeP contoured at  $5\sigma$  corresponding to residue  $\beta$ Ser188Ala, the P-cluster, and in (a) and (b) the location lacking anomalous density at position M1 with a tentatively modelled Na (not shown).

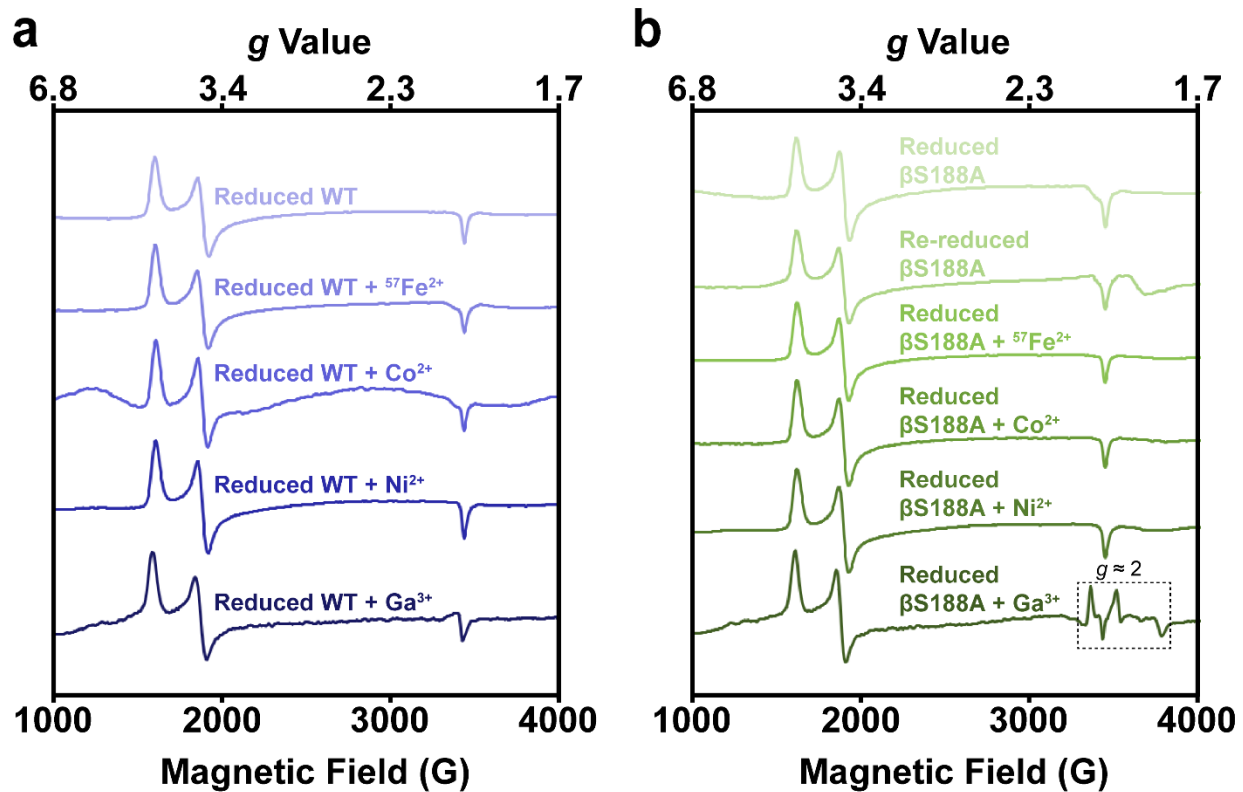

**Figure S5.** X-band EPR spectra collected at 4 K of DT-reduced wt and  $\beta\text{S188A}$  MoFeP incubated with heterometals. (a) DT-reduced wt MoFeP (top) soaked with  $^{57}\text{Fe}^{2+}$ ,  $\text{Co}^{2+}$ ,  $\text{Ni}^{2+}$ , and  $\text{Ga}^{3+}$  (top to bottom). (b) DT-reduced  $\beta\text{S188A}$  MoFeP (top) soaked with  $^{57}\text{Fe}^{2+}$ ,  $\text{Co}^{2+}$ ,  $\text{Ni}^{2+}$ , and  $\text{Ga}^{3+}$  (top to bottom). The  $\text{Ga}^{3+}$  spectrum has features in the  $g \approx 2$  region that are similar to the features in the oxidized  $\beta\text{S188A}$  MoFeP spectrum that does not have any metals added.

**Table S1.** Mössbauer best fit resolution of  $\beta$ S188A after reconstitution of the isotopically  $^{57}\text{Fe}^{2+}$  labeled MoFeP with natural abundance  $\text{Fe}^{2+}$ .

| <b>Feature</b>                        | <b><math>\Delta E_Q</math><br/>(mm/s)</b> | <b><math>\delta</math><br/>(mm/s)</b> | <b>Relative<br/>area (%)</b> |
|---------------------------------------|-------------------------------------------|---------------------------------------|------------------------------|
| D <sub>1</sub>                        | 0.777                                     | 0.616                                 | 22.7                         |
| D <sub>2</sub>                        | 0.763                                     | 0.362                                 | 39.7                         |
| Adventitious<br>$^{57}\text{Fe}^{2+}$ | 3.210                                     | 1.373                                 | 37.7                         |

**Table S2.** X-ray data collection and refinement statistics. Numbers in parentheses correspond to the highest resolution shell.

| PDB ID                               | Ox $\beta$ S188A + Ga <sup>3+</sup><br>8E3T | Ox $\beta$ S188A + Ni <sup>2+</sup><br>8E3U | Ox $\beta$ S188A + Co <sup>2+</sup><br>8E3V |
|--------------------------------------|---------------------------------------------|---------------------------------------------|---------------------------------------------|
| <b>Data collection</b>               |                                             |                                             |                                             |
| Beamline                             | SSRL 9-2                                    | ALS 8.3.1                                   | SSRL 9-2                                    |
| Wavelength (Å)                       | 1.19453, 1.19707                            | 1.48484, 1.50832                            | 1.60388, 1.61223                            |
| Space group                          | <i>P</i> <sub>2</sub> <sub>1</sub>          | <i>P</i> <sub>2</sub> <sub>1</sub>          | <i>P</i> <sub>2</sub> <sub>1</sub>          |
| Cell dimensions (Å)                  | 76.61 127.97 107.27                         | 77.26 129.01 107.76                         | 77.13 130.04 107.76                         |
| Cell angles (°)                      | 90.00 108.85 90.00                          | 90.00 109.22 90.00                          | 90.00 109.12 90.00                          |
| Resolution (Å)                       | 54.13 - 2.20                                | 79.89 - 1.99                                | 54.80 - 2.00                                |
| No. unique reflections               | 87128                                       | 136546                                      | 127562                                      |
| R <sub>merge</sub>                   | 0.190 (0.910)                               | 0.501 (8.645)                               | 0.134 (0.635)                               |
| Multiplicity                         | 5.8 (5.2)                                   | 5.6 (5.2)                                   | 6.3 (6.0)                                   |
| CC ½                                 | 0.986 (0.549)                               | 0.939 (0.003)                               | 0.993 (0.725)                               |
| <I/σ(I)>                             | 6.3 (1.9)                                   | 3.4 (0.5)                                   | 8.9 (2.6)                                   |
| Completeness (%)                     | 88.1 (88.8)                                 | 99.8 (99.9)                                 | 94.4 (93.0)                                 |
| <b>Refinement</b>                    |                                             |                                             |                                             |
| R <sub>work</sub> /R <sub>free</sub> | 0.223 / 0.242                               | 0.205 / 0.255                               | 0.174 / 0.203                               |
| No. atoms                            | 32075                                       | 31928                                       | 32582                                       |
| Protein                              | 30895                                       | 30811                                       | 30969                                       |
| Ligand/ion                           | 108                                         | 108                                         | 108                                         |
| Solvent                              | 1072                                        | 1009                                        | 1505                                        |
| B-factors (Å <sup>2</sup> )          |                                             |                                             |                                             |
| Protein                              | 28.09                                       | 36.16                                       | 26.05                                       |
| Ligand/ion                           | 28.21                                       | 34.88                                       | 21.42                                       |
| Solvent                              | 29.76                                       | 37.24                                       | 30.58                                       |
| R.m.s. deviations                    |                                             |                                             |                                             |
| Bond lengths (Å)                     | 0.034                                       | 0.037                                       | 0.034                                       |
| Bond angles (°)                      | 0.97                                        | 1.6                                         | 0.94                                        |
| Clashscore                           | 6.59                                        | 8.21                                        | 5.37                                        |
| Ramachandran plot (%)                |                                             |                                             |                                             |
| Favored                              | 95.51                                       | 96.05                                       | 96.61                                       |
| Outliers                             | 0.25                                        | 0.3                                         | 0.25                                        |
| Rotamer outliers (%)                 | 2.92                                        | 2.95                                        | 2.26                                        |



**Table S3.** ICP-MS analysis of MoFeP reconstituted with  $^{57}\text{Fe}^{2+}$ ,  $\text{Co}^{2+}$ ,  $\text{Ni}^{2+}$ , and  $\text{Ga}^{3+}$ . The listed values are averages of five replicate measurements of a single sample.

|                                    | WT MoFeP   |              | $\beta$ Ser188Ala MoFeP |              | Theoretical value if one metal-center is inserted per P-cluster* | Theoretical value if two metal-centers are inserted per P-cluster* |
|------------------------------------|------------|--------------|-------------------------|--------------|------------------------------------------------------------------|--------------------------------------------------------------------|
|                                    | DT-reduced | IDS-oxidized | DT-reduced              | IDS-oxidized |                                                                  |                                                                    |
| $^{56}\text{Fe}.$ $^{57}\text{Fe}$ | 48.0       | 39.0         | 34.0                    | 4.8          | 14.6                                                             | 7.0                                                                |
| Fe:Co                              | 310.9      | 209.0        | 69.3                    | 19.2         | 14                                                               | 6.5                                                                |
| Fe:Ni                              | 339.3      | 286.3        | 82.6                    | 22.2         | 14                                                               | 6.5                                                                |
| Fe:Ga                              | 62.4       | 39.0         | 5.6                     | 4.9          | 14                                                               | 6.5                                                                |

*n/d* represents that the reconstitution metal ( $^{57}\text{Fe}^{2+}$ ,  $\text{Co}^{2+}$ ,  $\text{Ni}^{2+}$ , or  $\text{Ga}^{3+}$ ) was not detected/ below the detection limit

\*Calculations determined using 30 Fe atoms per non-reconstituted MoFeP, and 2% natural abundance  $^{57}\text{Fe}$ .
